# Supplementary material for: Gas sensors based on the oxide skin of liquid indium
Source: Royal Society of Chemistry journal article supplement (doi:10.1039/d2nr05926f), 2023-01-01
Supplement: d2nr05926f1.pdf [file d2nr05926f1.pdf]

## Supplementary Information

### Gas sensors based on the oxide skin of liquid indium

Xiangyang Guo,<sup>a</sup> Chung Kim Nguyen,<sup>a</sup> Aishani Mazumder,<sup>a</sup> Yichao Wang,<sup>ab</sup> Nitu Syed,<sup>ae</sup> Enrico Della Gaspera,<sup>c</sup> Torben Daeneke,<sup>a</sup> Sumeet Walia,<sup>a</sup> Samuel J. Ippolito,<sup>a</sup> Ylias M. Sabri,<sup>a</sup> Yongxiang Li,<sup>\*a</sup> Ali Zavabeti<sup>\*ad</sup>

<sup>a</sup> School of Engineering, RMIT University, Melbourne, VIC, 3000, Australia. Email: yongxiang.li@rmit.edu.au and ali.zavabeti@rmit.edu.au

<sup>b</sup> School of Life and Environmental Sciences, Deakin University, Waurn Ponds, Victoria 3216, Australia

<sup>c</sup> School of Science, RMIT University, Melbourne, VIC, 3000, Australia.

<sup>d</sup> Department of Chemical Engineering, The University of Melbourne, Parkville, Victoria 3010, Australia, Email: ali.zavabeti@unimelb.edu.au

<sup>e</sup> School of Physics, The University of Melbourne, Parkville, Melbourne, Victoria 3010, Australia

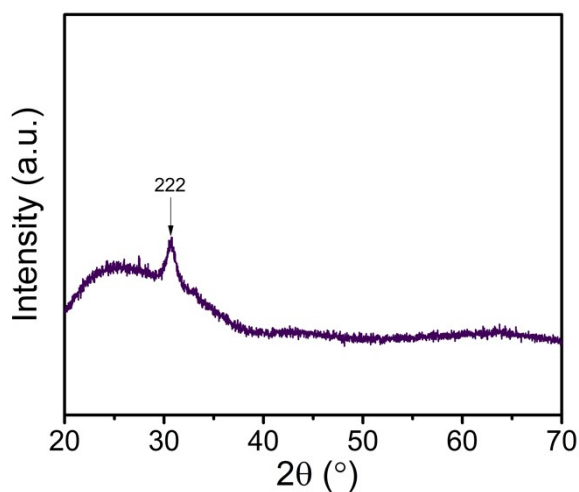

**Supplementary Figure S1.** XRD pattern of multi-transferred In<sub>2</sub>O<sub>3</sub> on glass substrate.

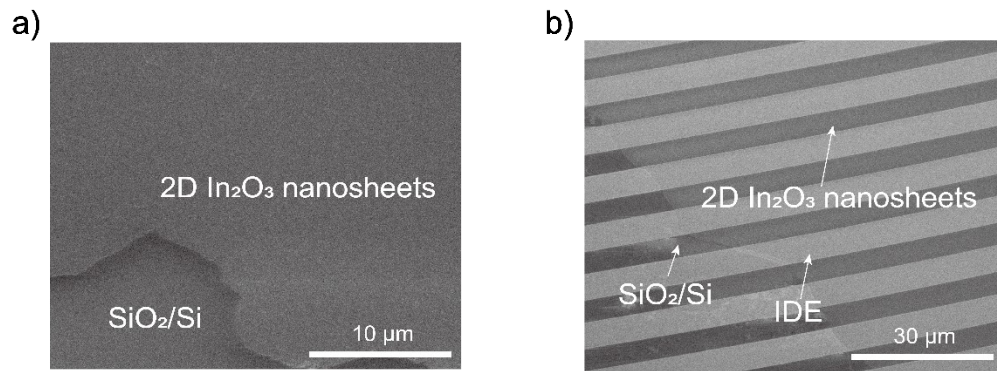

**Suppleme**

**ntary Figure S2.** The SEM images of 2D In<sub>2</sub>O<sub>3</sub>. a) A SEM image of 2D In<sub>2</sub>O<sub>3</sub> nanosheets on SiO<sub>2</sub>/Si substrate. b) A SEM image of 2D In<sub>2</sub>O<sub>3</sub> nanosheets on IDEs.

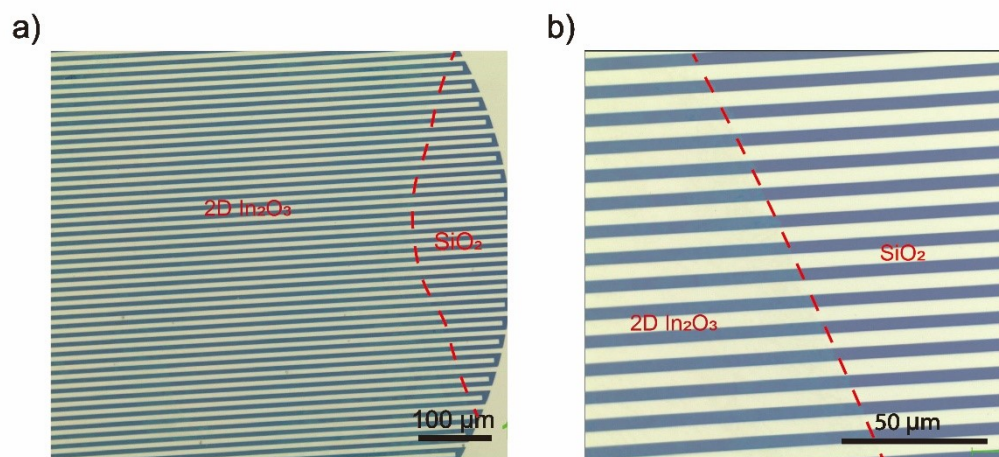

**Supplementary Figure S3.** The optical images of 2D In<sub>2</sub>O<sub>3</sub> nanosheets on IDEs at different magnifications.

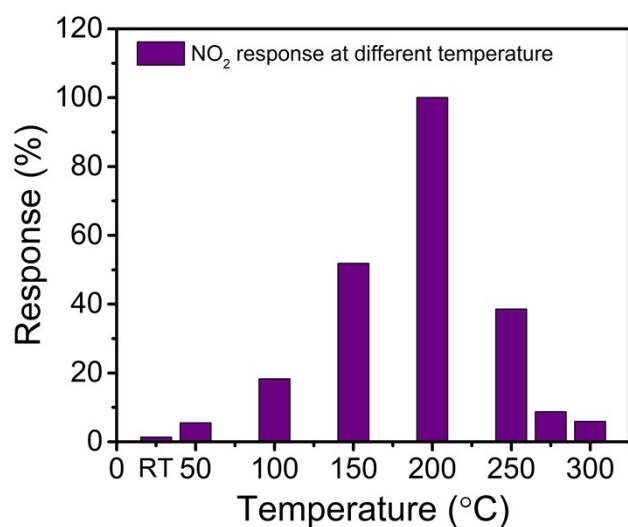

**Supplementary Figure S4.** Optimization of 2D In<sub>2</sub>O<sub>3</sub> response to NO<sub>2</sub> against temperature.

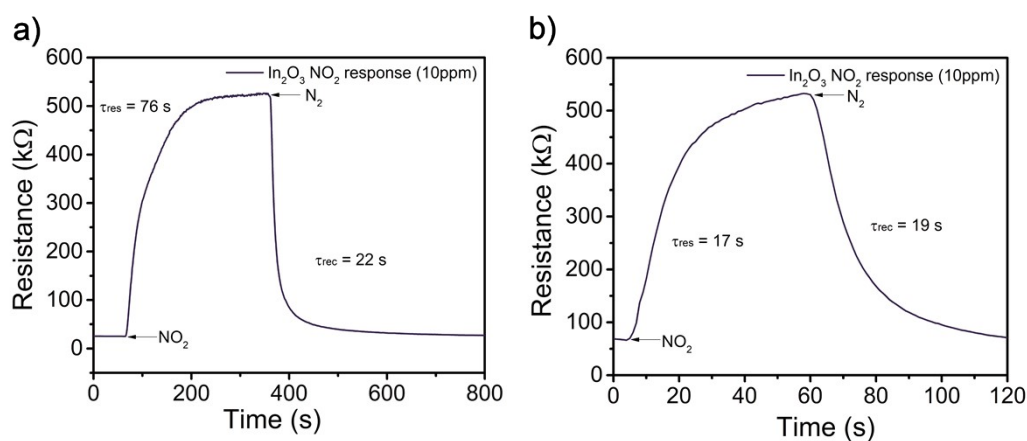

**Supplementary Fig. S5.** Response-recovery of 2D In<sub>2</sub>O<sub>3</sub> gas sensors to 10 ppm NO<sub>2</sub> at 200 °C under steady-state and transient conditions. a) Steady-state response-recovery cycle of 2D In<sub>2</sub>O<sub>3</sub> gas sensors to 10 ppm NO<sub>2</sub> in 5 min in NO<sub>2</sub> and 10 min in N<sub>2</sub>. The response of 1974 %. b) Transient response of 700 % to 10 ppm NO<sub>2</sub> in 1 min in NO<sub>2</sub> and 1 min in N<sub>2</sub>, showing practical response-recovery times of less than 20 s.

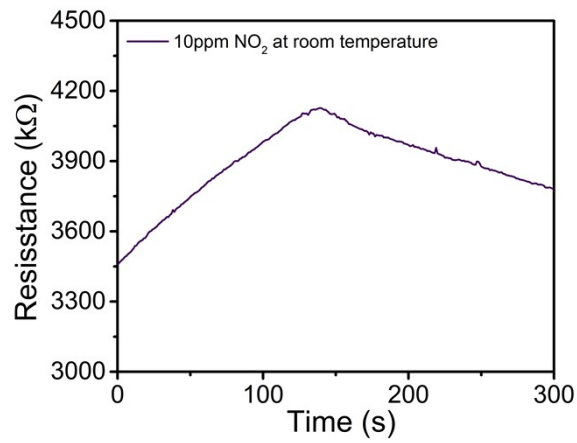

**Supplementary Figure S6.** Room temperature response-recovery cycle of the of 2D In<sub>2</sub>O<sub>3</sub> in 10 ppm NO<sub>2</sub>.

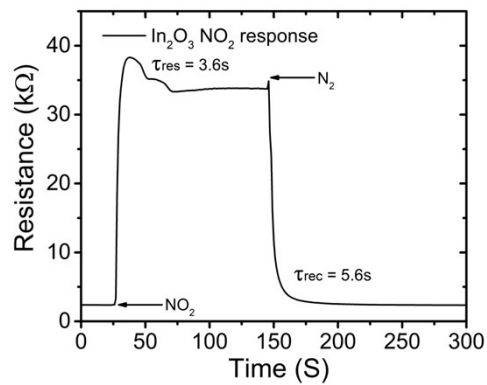

**Supplementary Figure S7.** The steady-state response-recovery cycle of 2D In<sub>2</sub>O<sub>3</sub> gas sensor to 10 ppm NO<sub>2</sub> at 275 °C showing 1514 % response and 3.6 s and 5.6 response and recovery times, respectively.

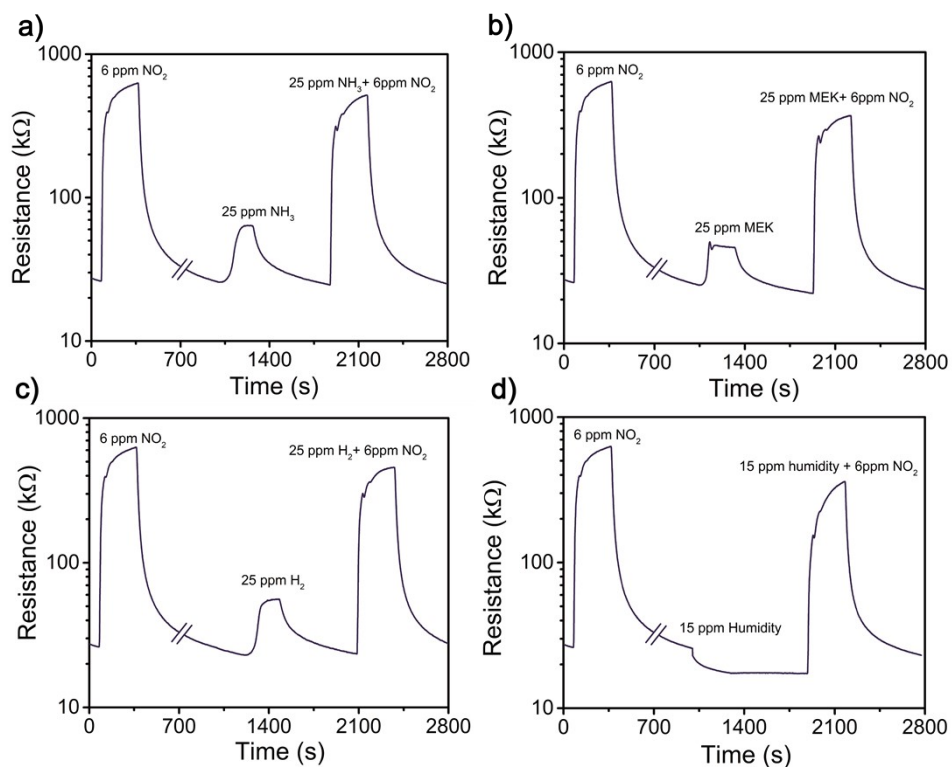

**Supplementary Figure S8.** Developed sensor's cross selectivity data at 200 °C. **a)** 2D  $\text{In}_2\text{O}_3$  gas sensor response to 25 ppm  $\text{NH}_3$  (including 2.5%  $\text{O}_2$ ) and  $\text{NH}_3$  mixed with  $\text{NO}_2$ . **b)** 2D  $\text{In}_2\text{O}_3$  gas sensor response to 25 ppm MEK (including 2.5%  $\text{O}_2$ ) and MEK mixed with  $\text{NO}_2$ . **c)** 2D  $\text{In}_2\text{O}_3$  gas sensor response to 25 ppm  $\text{H}_2$  (include 2.5%  $\text{O}_2$ ) and  $\text{H}_2$  mixed with  $\text{NO}_2$ . **d)** 2D  $\text{In}_2\text{O}_3$  gas sensor response to 15 ppm  $\text{H}_2\text{O}$  (include 2.5%  $\text{O}_2$ ) and  $\text{H}_2\text{O}$  mixed with  $\text{NO}_2$

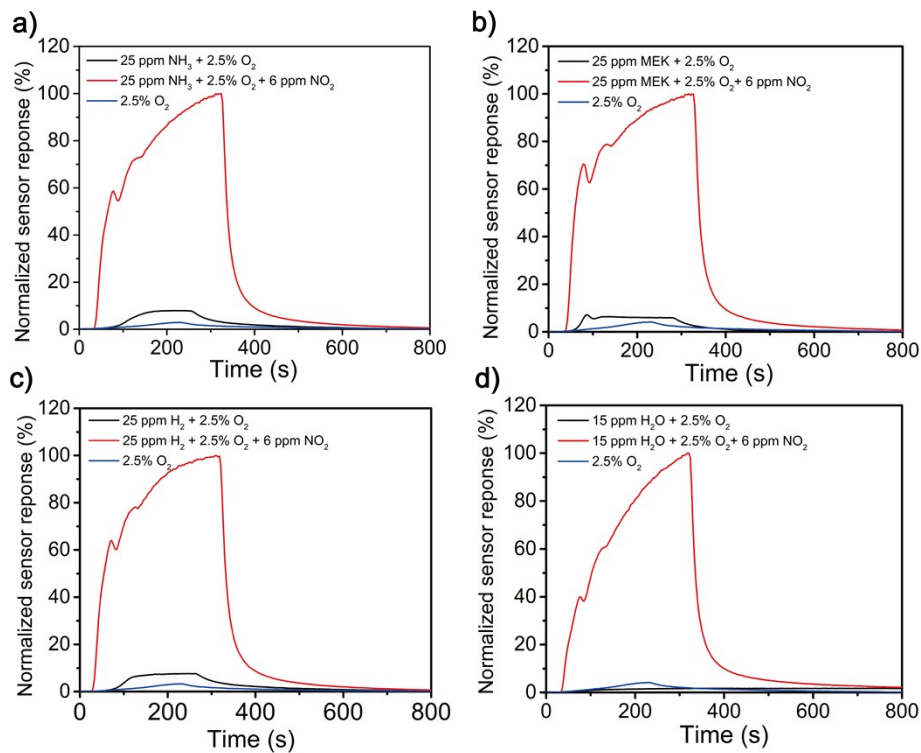

**Supplementary Figure S9.** Control experiments for cross-sensitivity analysis at 200 °, primarily to assess the effect of O<sub>2</sub> on the sensing mechanism for a)NH<sub>3</sub>, b)MEK, c)H<sub>2</sub>, and d)H<sub>2</sub>O.

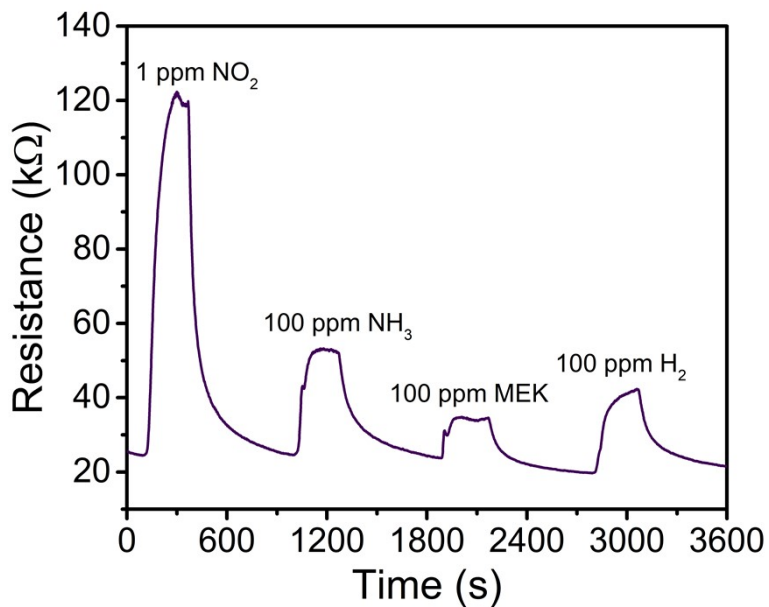

**Supplementary Figure S10.** Developed sensor's hysteresis data at 200 °C.

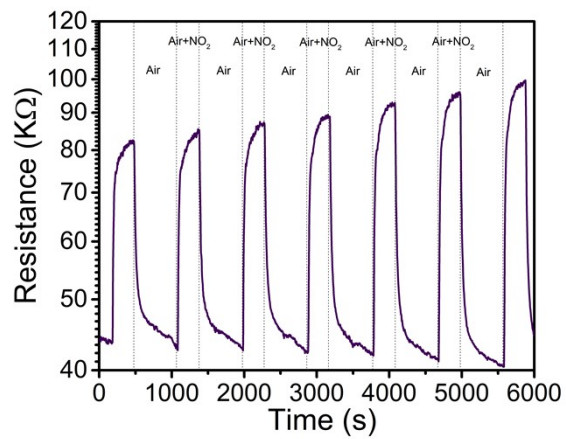

**Supplementary Figure S11.** Response of 2D  $\text{In}_2\text{O}_3$  gas sensors to 10 ppm  $\text{NO}_2$  in air.

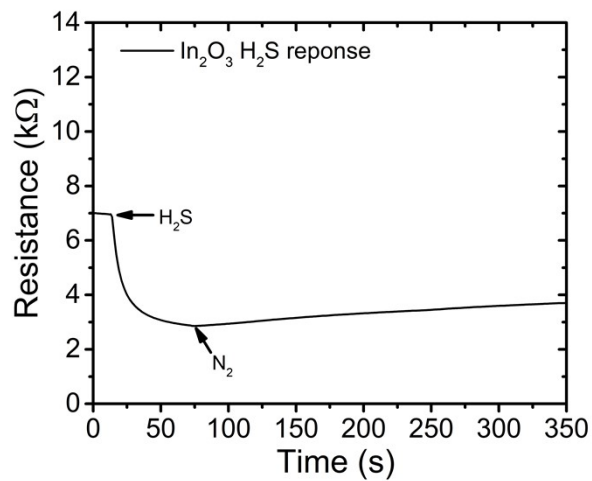

**Supplementary Figure S12.** Sensing performance of 2D  $\text{In}_2\text{O}_3$  to 100 ppm  $\text{H}_2\text{S}$  showing irreversible gas sensing behavior.

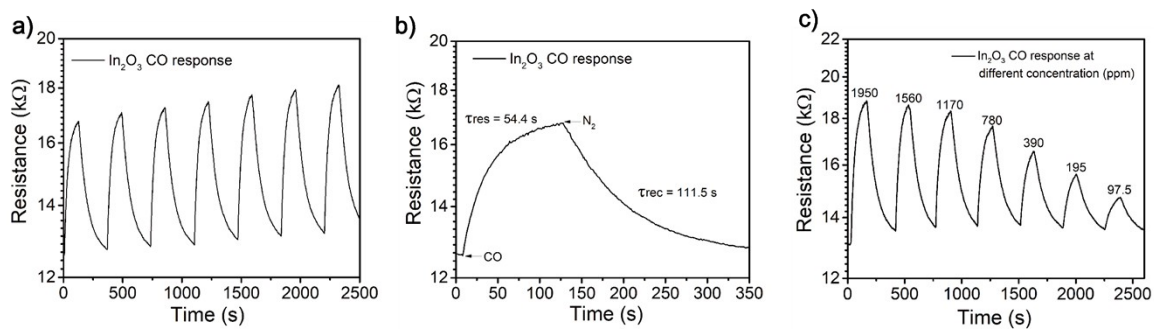

**Supplementary Figure S13.** a) Response and recovery cycles of  $\text{In}_2\text{O}_3$ -based gas sensors to  $1950\text{ ppm}$  CO at  $200^\circ\text{C}$ . b) Single response and recovery curve of  $\text{In}_2\text{O}_3$ -based gas sensors to  $1950\text{ ppm}$  CO at  $200^\circ\text{C}$ . c) Repeated response and recovery curves of  $\text{In}_2\text{O}_3$ -based gas sensors to different concentrations of CO at  $200^\circ\text{C}$ .



**Supplementary Table 1.** Comparison of nanoscale In<sub>2</sub>O<sub>3</sub>-based gas sensors for nitrogen dioxide detection with different morphologies recently reported in the literature.

| <b>Sensing materials</b>                 | <b>Morphology</b> | <b>Temperature (°C)</b> | <b>Response (%)</b> | <b>Response time (s)</b> | <b>NO<sub>2</sub> detected (ppm)</b> | <b>Limit of detection (ppm)</b> | <b>Ref</b> |
|------------------------------------------|-------------------|-------------------------|---------------------|--------------------------|--------------------------------------|---------------------------------|------------|
| In <sub>2</sub> O <sub>3</sub>           | Nanosheets        | RT                      | 89.48               | 16.6                     | 97                                   | -                               | 1          |
| In <sub>2</sub> O <sub>3</sub>           | Nanosheets        | 120                     | 213                 | 4                        | 10                                   | 0.01                            | 2          |
| In <sub>2</sub> O <sub>3</sub>           | Microcubes        | 100                     | 1401                | 16                       | 100                                  | -                               | 3          |
| In <sub>2</sub> O <sub>3</sub>           | Microcubes        | 60                      | 1884                | -                        | 30                                   | 2                               | 4          |
| In <sub>2</sub> O <sub>3</sub>           | Microcubes        | 100                     | 336                 | 18                       | 100                                  | 0.001                           | 5          |
| In <sub>2</sub> O <sub>3</sub>           | Nanoparticles     | 300                     | 1.09                | 120                      | 3                                    | -                               | 6          |
| In <sub>2</sub> O <sub>3</sub>           | Nanosheets        | 250                     | 164                 | 5                        | 50                                   | -                               | 7          |
| In <sub>2</sub> O <sub>3</sub>           | Nanorods          | 80                      | 82                  | 70                       | 2                                    | 0.1                             | 8          |
| Sn/ In <sub>2</sub> O <sub>3</sub>       | Nanofibers        | 90                      | 44.6                | 106                      | 1                                    | -                               | 9          |
| Pd/ In <sub>2</sub> O <sub>3</sub>       | Nanosheets        | 110                     | 4080                | 120                      | 50                                   | 0.5                             | 9          |
| Pd/ In <sub>2</sub> O <sub>3</sub>       | Nanowires         | 300                     | 3.4                 | 60                       | 30                                   | -                               | 10         |
| Graphene/ In <sub>2</sub> O <sub>3</sub> | Nanofiber         | 50                      | 42                  | 261                      | 5                                    | 0.00086                         | 11         |
| Ti/ In <sub>2</sub> O <sub>3</sub>       | Thin films        | 400                     | 16.95               | -                        | 0.080                                | -                               | 12         |
| This work                                | 2D sheets         | RT                      | 55                  | >150 s                   | 10                                   | -                               |            |
| This work                                | 2D sheets         | 200                     | 1974                | 76                       | 10                                   | 0.004                           |            |
| This work                                | 2D sheets         | 275                     | 1514                | 3.6                      | 10                                   | -                               |            |

## Reference

1. L. Sun, W. C. Fang, Y. Yang, H. Yu, T. T. Wang, X. T. Dong, G. X. Liu, J. X. Wang, W. S. Yu and K. Y. Shi, *Rsc Advances*, 2017, **7**, 33419-33425.
2. X. Wang, J. Su, H. Chen, G. D. Li, Z. Shi, H. Zou and X. Zou, *ACS Appl. Mater. Interfaces*, 2017, **9**, 16335-16342.
3. K. K. Pawar, J. S. Shaikh, S. S. Mali, Y. H. Navale, V. B. Patil, C. K. Hong and P. S. Patil, *J Alloy Compd*, 2019, **806**, 726-736.
4. S. T. Navale, C. Liu, Z. Yang, V. B. Patil, P. Cao, B. Du, R. S. Mane and F. J. Stadler, *J Alloy Compd*, 2018, **735**, 2102-2110.
5. Z. J. Li, S. N. Yan, M. X. Sun, H. Li, Z. L. Wu, J. Q. Wang, W. Z. Shen and Y. Q. Fu, *J Alloy Compd*, 2020, **816**.
6. P. S. Khiabani, E. Marzbanrad, H. Hassani and B. Raissi, *J Am Ceram Soc*, 2013, **96**, 2493-2498.
7. L. P. Gao, Z. X. Cheng, Q. Xiang, Y. Zhang and J. Q. Xu, *Sensor Actuat B-Chem*, 2015, **208**, 436-443.
8. W. J. Du, W. X. Si, J. B. Zhao, F. L. Wang, Z. J. Han, Z. Wang, W. Liu, G. X. Lu, J. R. Liu and L. L. Wu, *Ceram Int*, 2020, **46**, 20385-20394.
9. J. S. Ri, X. W. Li, C. L. Shao, Y. Liu, C. H. Han, X. H. Li and Y. C. Liu, *Sensor Actuat B-Chem*, 2020, **317**.
10. S. S. Kim, J. Y. Park, S.-W. Choi, H. G. Na, J. C. Yang and H. W. Kim, *J Alloy Compd*, 2011, **509**, 9171-9177.
11. C. Yan, H. B. Lu, J. Z. Gao, Y. Zhang, Q. M. Guo, H. X. Ding, Y. T. Wang, F. F. Wei, G. Q. Zhu, Z. B. Yang and C. L. Wang, *J Alloy Compd*, 2018, **741**, 908-917.
12. L. G. Bloor, J. Manzi, R. Binions, I. P. Parkin, D. Pugh, A. Afonja, C. S. Blackman, S. Sathasivam and C. J. Carmalt, *Chemistry of Materials*, 2012, **24**, 2864-2871.
